# Supplementary material for: Temporal changes in the structure of a plant-frugivore network are influenced by bird migration and fruit availability
Source: PeerJ. 2016 Jun 8;4:e2048. doi: 10.7717/peerj.2048 (PMC4906665; doi:10.7717/peerj.2048)
Supplement: Data S2 [file peerj-04-2048-s005.xlsx]

## Sheet: Network1
	B26	B40	B30	B10	B13	B14	B19	B20	B21	B25	B27	B28	B29	B31	B35
P2	0	1	0	0	0	0	0	0	0	0	0	0	0	0	0
P3	1	0	1	1	11	8	12	0	0	0	27	0	4	0	1
P9	0	0	0	0	0	0	0	0	0	0	0	0	0	2	0
P23	0	0	0	0	2	0	0	0	0	0	0	0	0	0	0
P20	0	0	0	0	2	0	0	0	0	1	0	0	0	0	0
P28	0	0	0	0	0	0	0	0	1	0	0	0	0	0	0
P24	0	0	0	0	0	0	0	2	0	0	0	0	0	0	0
P29	0	1	0	0	0	0	0	0	0	0	0	0	0	0	0
P41	0	0	0	0	0	0	0	0	0	0	0	1	0	0	0

## Sheet: Network2
	B4	B6	B8	B15	B40	B42	B13	B19	B21	B27	B33	B34	B36	B38
P2	1	0	0	0	1	0	0	0	0	0	0	0	0	0
P3	1	0	8	2	1	0	0	5	3	0	0	10	0	2
P5	3	0	0	0	3	0	0	0	0	0	0	0	0	0
P10	0	1	0	0	0	0	0	0	0	0	0	0	0	0
P13	0	0	0	0	0	0	0	0	0	0	0	1	0	0
P18	0	0	0	0	0	0	0	0	0	0	0	1	0	0
P23	0	0	0	0	0	0	0	5	0	1	1	0	0	0
P20	3	0	0	0	0	0	0	0	0	0	0	0	0	0
P22	0	0	0	0	3	0	0	0	0	0	0	0	1	0
P30	9	0	0	0	0	0	0	0	0	0	0	0	0	0
P25	0	0	0	0	0	0	3	0	0	1	0	2	0	0
P26	0	0	0	0	0	0	2	0	0	0	0	0	0	0
P31	0	0	0	0	0	1	0	0	0	0	0	0	0	0
P42	0	0	0	0	0	0	0	0	0	0	0	1	0	0

## Sheet: Network3
	B4	B5	B8	B11	B7	B18	B22	B37	B40	B1	B2	B30	B9	B10	B13	B14	B16	B19	B20	B21	B27	B29	B34	B35	B36	B38
P3	0	1	6	3	1	1	1	50	1	17	0	10	1	2	27	8	2	36	2	0	26	17	12	1	0	0
P6	1	0	0	0	0	0	0	0	0	1	0	0	0	0	0	0	0	0	0	0	0	0	0	0	0	0
P11	0	0	0	0	0	0	0	0	0	0	0	0	0	0	1	2	0	0	0	1	2	1	3	0	4	2
P13	0	0	0	0	0	0	0	0	0	0	0	0	0	0	0	2	0	0	0	0	0	0	0	0	0	0
P32	0	0	0	0	0	0	0	7	0	0	0	0	0	1	1	2	0	0	0	0	2	0	0	0	1	3
P21	0	0	0	0	0	0	0	0	0	0	1	0	0	0	0	0	0	0	0	0	0	0	0	0	0	0
P27	1	0	0	0	3	0	0	0	0	0	0	0	0	0	0	0	0	0	0	0	16	0	0	0	5	0
P31	0	0	0	0	1	0	0	0	0	0	0	0	0	0	0	0	0	0	0	0	0	0	0	0	0	0
P44	2	0	0	0	0	0	0	0	0	0	0	0	0	4	0	1	0	0	0	0	3	0	0	0	1	0

## Sheet: Network4
	B37	B1	B30	B13	B14	B20	B23	B27	B29	B32	B34	B35	B36
P3	2	0	0	0	0	0	0	0	1	0	0	0	0
P12	0	0	2	1	5	0	12	0	7	0	2	0	0
P33	0	0	0	0	1	0	0	0	0	0	0	0	0
P17	0	13	0	0	0	0	0	2	8	1	1	2	0
P28	0	0	1	1	0	0	0	0	0	0	0	0	1
P34	0	0	0	0	0	8	0	0	0	0	0	0	0

## Sheet: Network5
	B30	B10	B12	B13	B14	B19	B20	B23	B27	B29	B32	B34
P6	0	0	0	0	0	0	0	0	3	0	0	0
P8	0	0	0	0	0	0	0	0	0	2	0	0
P12	6	1	5	1	7	4	1	29	1	44	4	10
P1	0	0	0	0	3	0	3	5	1	1	4	2

## Sheet: Network6
	B18	B30	B3	B10	B13	B14	B19	B20	B21	B23	B25	B27	B29	B32	B34	B35	B36
P6	0	0	0	0	0	0	5	0	0	0	0	0	0	0	0	0	0
P12	0	2	0	0	3	1	5	2	0	4	0	1	1	2	3	0	0
P35	0	0	0	1	1	0	2	0	0	0	0	5	0	0	0	0	1
P14	0	2	21	0	2	10	1	9	1	62	1	4	0	10	0	1	0
P17	0	0	0	0	3	4	0	0	0	0	0	0	2	0	0	1	0
P20	0	0	0	0	0	0	0	0	0	0	0	0	0	0	0	0	3
P43	2	0	0	0	0	0	2	0	0	10	0	0	0	0	0	0	0

## Sheet: Network7
	B11	B18	B1	B30	B3	B13	B14	B19	B20	B23	B27	B29	B32	B34	B36
P3	0	0	1	0	0	0	0	2	0	0	0	0	0	0	0
P5	0	0	0	0	0	0	0	2	0	0	0	0	0	0	0
P15	9	0	0	2	2	0	7	0	0	7	0	0	2	0	1
P16	0	0	6	0	0	0	0	0	0	0	0	0	0	0	0
P14	0	0	0	0	0	1	7	0	0	7	2	0	0	0	0
P19	17	0	0	0	0	0	5	0	4	0	0	6	0	0	0
P20	0	2	0	0	0	4	9	2	2	0	0	0	2	5	10

## Sheet: Network8
	B5	B8	B11	B7	B37	B39	B41	B1	B30	B10	B13	B14	B16	B19	B17	B20	B23	B27	B29	B32	B33	B34	B35	B36
P4	1	3	0	1	0	274	1	0	0	0	0	0	4	3	10	0	0	7	0	0	0	1	0	4
P8	0	0	0	0	0	0	0	0	0	0	0	13	0	0	0	0	0	0	0	0	0	0	0	0
P15	0	130	3	0	0	62	0	13	6	0	9	10	0	13	0	2	4	17	2	10	4	3	0	10
P16	0	0	0	0	0	0	0	0	0	0	0	2	0	0	0	0	0	0	0	0	0	0	0	0
P14	0	0	0	0	0	0	0	0	0	0	0	0	0	0	0	0	0	3	0	0	0	0	0	0
P36	0	0	0	0	0	0	0	0	0	0	0	2	0	0	0	0	3	0	0	0	0	0	0	0
P19	0	0	0	0	0	0	0	0	1	11	1	14	0	0	0	13	0	2	4	0	0	0	0	0
P20	0	15	2	0	2	370	0	0	0	0	2	3	0	3	3	2	0	4	0	0	0	3	1	8
P24	0	0	0	0	3	25	0	0	0	0	0	0	0	0	0	0	0	0	0	0	0	0	0	0
P37	0	0	0	2	0	0	0	0	0	0	0	0	0	0	0	0	0	0	0	0	0	0	0	0
P38	0	0	0	0	0	0	0	0	0	0	0	0	1	0	0	0	0	0	0	0	0	0	0	0
B43	0	0	0	1	0	0	0	0	0	0	0	0	0	0	0	0	4	0	0	0	0	0	0	0

## Sheet: Network9
	B4	B8	B15	B24	B37	B41	B1	B30	B13	B14	B16	B19	B20	B27	B34
P3	0	1	1	2	3	1	29	0	6	7	1	5	0	2	4
P4	2	0	0	0	0	0	0	0	0	0	0	0	0	0	0
P8	0	0	0	0	0	0	0	3	0	0	0	0	0	0	0
P39	1	0	0	0	0	0	0	0	0	0	0	0	0	0	0
P20	0	0	0	0	0	0	0	0	0	3	0	0	0	0	0
P24	23	0	0	0	0	0	0	0	0	0	0	0	4	0	0

## Sheet: Network10
	B4	B40	B42	B1	B13	B14	B16	B19	B20	B25	B27	B29	B32	B33	B34	B35	B36
P3	0	2	6	2	11	14	1	13	0	0	13	0	2	0	10	1	0
P7	6	0	0	0	0	0	0	0	6	1	2	0	0	0	0	0	6
P40	6	0	0	0	0	0	0	0	0	0	0	0	0	0	0	0	0
P13	0	0	0	0	0	1	0	0	0	0	0	0	0	0	0	0	0
P16	0	0	0	7	0	0	0	0	0	0	0	0	0	0	0	0	0
P18	0	0	0	0	0	1	0	0	0	0	0	0	0	2	0	0	0
P23	0	0	0	0	0	0	0	2	0	0	0	0	0	0	0	0	0
P20	8	0	0	0	0	0	0	0	0	0	13	0	0	0	0	0	0
P25	0	0	0	0	0	5	0	0	0	0	3	1	0	0	1	0	9
P26	0	0	0	0	0	0	0	0	3	0	0	0	0	0	0	0	0
P41	0	0	0	0	0	2	0	0	0	0	0	0	0	0	0	0	0
